# Supplementary material
Source: PubMed Central journal article supplement (PMC9460855)
Supplement: NIHMS1674862-supplement-Fig__A1.pdf [file NIHMS1674862-supplement-Fig__A1.pdf]

## Appendix

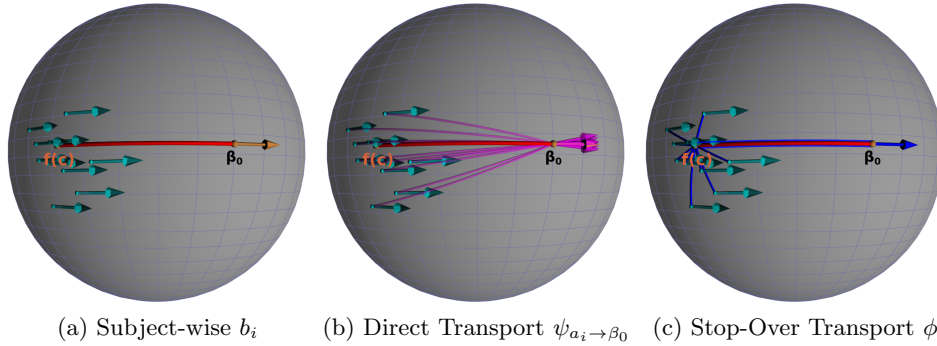

Fig. A1: Synthetic Example on a  $S^2$  manifold for stop-over transport  $\phi$ . (a) Ten subject-wise slope tangent vectors parallel to the equator attached to subject-wise intercepts (cyan) generated by random perturbation of  $f(c)$ . Brown arrow is the ground truth tangent vector at  $\beta_0$ . (b) Direct parallel transport  $\psi_{f(c) \rightarrow \beta_0}$  generates an inconsistent set of transported tangent vectors (magenta arrows). (c) The proposed stop-over transport  $\phi$  consistently moves  $b_i$  to  $f(c)$  and then from  $f(c)$  to  $\beta_0$  (blue curves) without arbitrarily rotating them which results in a consistent tangent vector at  $\beta_0$  (blue arrow) equal to the ground truth.
